# Supplementary material for: Myeloid-derived suppressor cells promote tumor growth and sorafenib resistance by inducing FGF1 upregulation and fibrosis
Source: PubMed Central journal article supplement — Neoplasia. 2022 Apr 1;28:100788. doi: 10.1016/j.neo.2022.100788 (PMC8980488; doi:10.1016/j.neo.2022.100788), 2022-04-01
Supplement: mmc1.pdf [file mmc1.pdf]

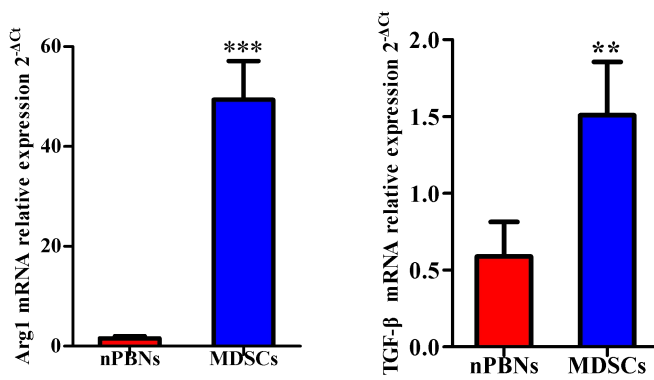

**Figure S1**

The relative expression of Arginase(Arg)1 and TGF-β mRNA in nPBNs and MDSCs.

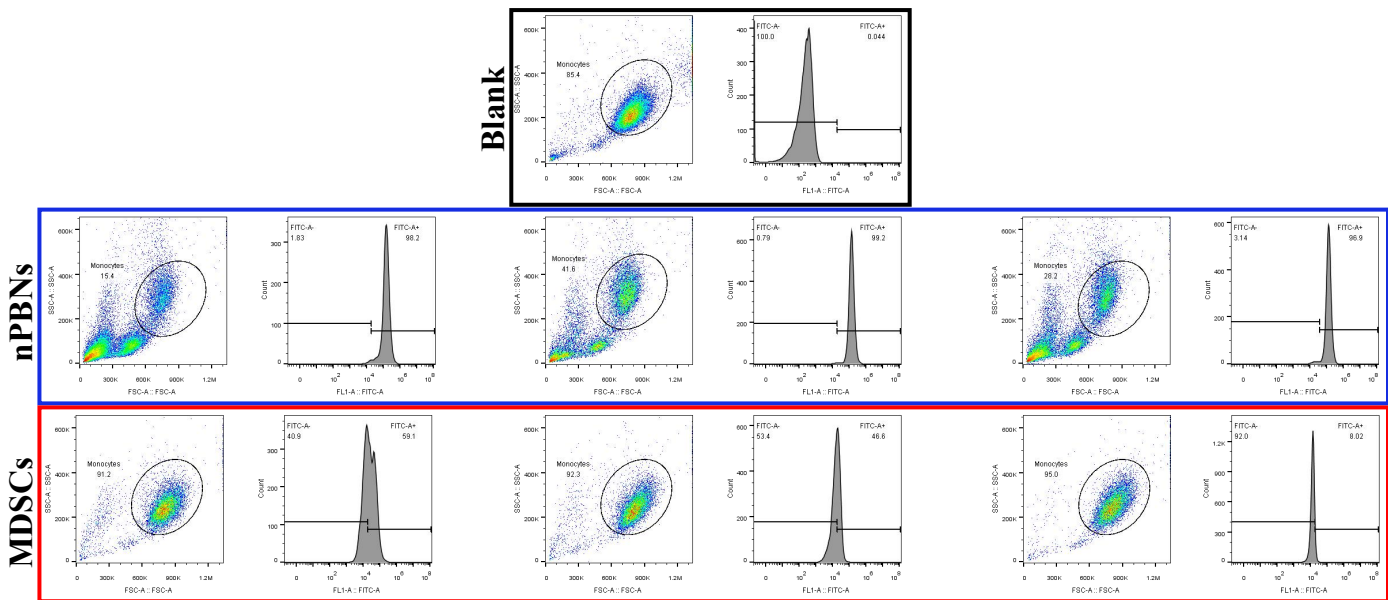

**Figure S2** ROS in MDSCs and nPBNs. FITC-DCFH. nPBNs and MDSCs were isolated from balb/c mice and incubated with 2'-7'-dichlorodihydrofluorescein diacetate (DCFH-DA, Beyotime).

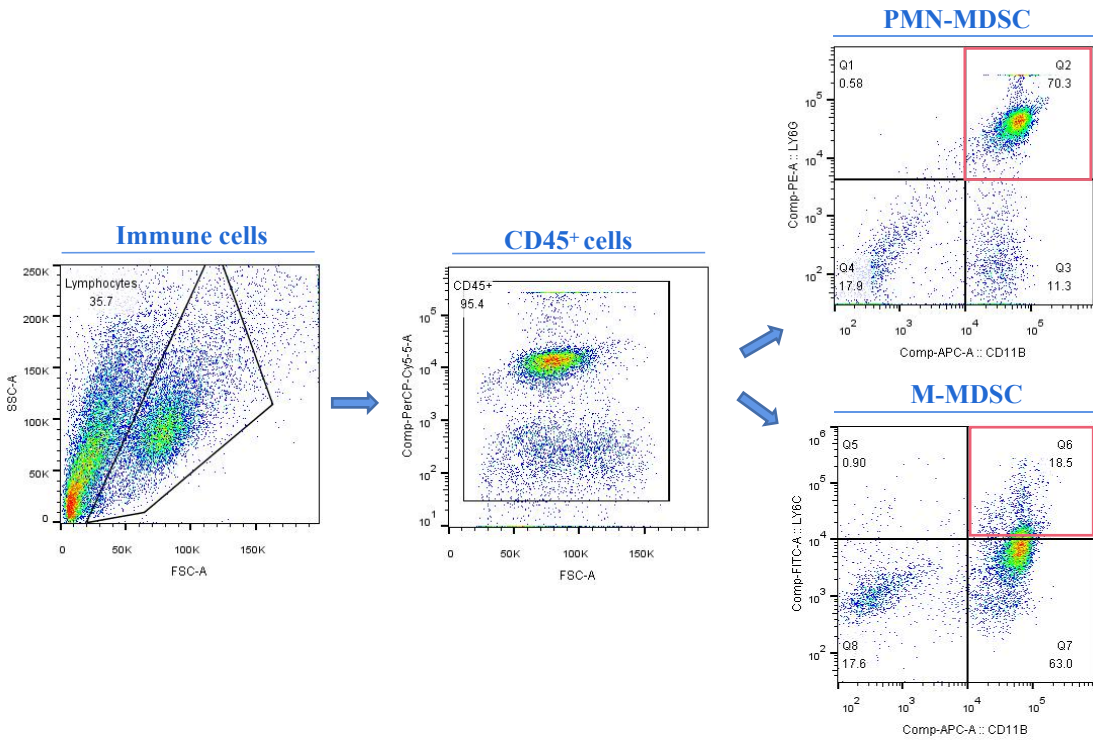

**Figure S3** Gating strategy for the MDSC subsets.

PMN-MDSC: CD11b<sup>+</sup>Ly6G<sup>+</sup> M-MDSC:CD11b<sup>+</sup>Ly6C<sup>+</sup>

## **Library preparation, and Illumina HiSeq xten/Nova seq 6000 Sequencing**

RNA-seq transcriptome library was established following TruSeq™ RNA sample preparation Kit from Illumina (San Diego, CA) with 1 µg of total RNA. First, messenger RNA (mRNA) was isolated according to polyA selection method by oligo(dT) beads and fragmented by fragmentation buffer. Secondly, a SuperScript double-stranded cDNA synthesis kit (Invitrogen, CA) was used to synthesize double-stranded cDNA with random hexamer primers (Illumina).

Next, the synthesized cDNA was subjected to end-repair, and phosphorylation and 'A' base addition following Illumina's library construction protocol. Libraries were size selected for cDNA target fragments of 300 bp on 2% Low Range Ultra Agarose followed by PCR amplified using Phusion DNA polymerase (NEB) for 15 PCR cycles. After quantified by TBS380, paired-end RNA-seq sequencing library was sequenced with the Illumina HiSeq xten/NovaSeq 6000 sequencer (2 × 150bp read length).

## **Read**

SeqPrep (<https://github.com/jstjohn/SeqPrep>) and Sickle (<https://github.com/najoshi/sickle>) were used to trim and quality control for the raw data. With HISAT2 (<http://ccb.jhu.edu/software/hisat2/index.shtml>) [1] software, clean reads were separately aligned to reference genome with orientation mode.

## **Differential expression analysis and functional enrichment**

The transcript expression level was calculated according to the TPM (transcripts per million) reads method. Quantify gene abundances were analyzed by RSE

M(<http://deweylab.biostat.wisc.edu/rsem/>)[2]. Notably, differential expression analysis was completed using the DESeq2[3] (p value  $\leq 0.05$ , DEGs(differential expression genes) with  $|\log_2FC| > 1$  and p value  $\leq 0.05$  /p value  $\leq 0.001$  were considered to be significantly). KEGG pathway analysis were carried out by KOBAS(<http://kobas.cbi.pku.edu.cn/home.do>)[4].

## References

- 1 Kim D, Langmead B, Salzberg SL. HISAT: a fast spliced aligner with low memory requirements. *NAT METHODS*. 2015;12(4):357-60. 'doi':10.1038/nmeth.3317.
- 2 Li B, Dewey CN. RSEM: accurate transcript quantification from RNA-Seq data with or without a reference genome. *BMC BIOINFORMATICS*. 2011;12:323. 'doi':10.1186/1471-2105-12-323.
- 3 Love MI, Huber W, Anders S. Moderated estimation of fold change and dispersion for RNA-seq data with DESeq2. *GENOME BIOL*. 2014;15(12):550. 'doi':10.1186/s13059-014-0550-8.
- 4 Xie C, Mao X, Huang J, Ding Y, Wu J, Dong S et al. KOBAS 2.0: a web server for annotation and identification of enriched pathways and diseases. *NUCLEIC ACIDS RES*. 2011;39(Web Server issue):W316-22. 'doi':10.1093/nar/gkr483.

### **In vivo assays for tumor growth**

For bearing mice,  $3 \times 10^6$  BNL was alone or co-injected with  $3 \times 10^5$  MDSCs isolated from the peripheral blood of BNL-bearing balb/c mice into the subcutaneous space of the right flank of corresponding mice (MDSCs : BNL cells = 1:10 ratio). After 1 week of tumor engraft, mice bearing tumor were equally divided into groups by their tumor volume. MDSCs were injected into the tumor at the same amount weekly for 3 weeks from day 7 after injection. Control mice received an equal volume of saline injections. Mice were treated with vehicle solution (10% dimethyl sulfoxide + 40% polyethylene glycol 300 + 5% Tween-80 + 45% saline, 10 mL/kg) or sorafenib (30 mg/kg) by gavage when the xenografts were palpable from day 7 after inoculation. For MDSCs depletion-treatment experiments, The mice were treated with intraperitoneal injection of 100  $\mu$ g anti-Ly6G twice a week.

### **Cell isolation of tumor tissue**

Tumor tissues were sliced into 1 mm<sup>3</sup> pieces and incubated with RPMI 1640 medium containing collagenase IV (0.1 mg/ml, Worthington) and DNase I (1 mg/ml; Roche) at 37 °C for 30 min. Dissociated cells of tumor tissue were filtered through a 70- $\mu$ m cell strainer (BD Falcon). Red blood cells were then lysed in ACK lysis buffer at room temperature for 2 min, washed 2 times, and resuspended in precool PBS at  $1 \times 10^6$  cells/mL for Flow cytometric.

### **Flow Cytometry**

Fc-receptor blocking reagent (Miltenyi Biotec) was used to block the Fc-receptors on tumor cells, and a Percp/Cy5.5-CD45.2 antibody (Biolegend) marked nucleated

hematopoietic cells. Allophycocyanin (APC)-CD11b, fluorescein isothiocyanate (FITC)-Gr-1, phycoerythrin (PE)-Ly6G, FITC-Ly6C antibody (Biolegend) were used to identify MDSC subgroups.

### **ROS measurement**

ROS Kit(Beyotime, China)were appropriated to detect apoptotic cells and the expression of ROS as described previously. In particular, nPBNs and MDSCs were isolated from balb/c mice and incubated with 2'-7'-dichlorodihydrofluorescein diacetate (DCFH-DA, Beyotime) for 30 min. Stained cells were analyzed using the FACS Analyzer (BECKMAN). The results were analyzed with FlowJo10.0 software (FlowJo).
